# Supplementary material for: Maternal total energy, macronutrient and vitamin intakes during pregnancy associated with the offspring’s birth size in the Japan Environment and Children’s Study
Source: PubMed Central journal article supplement (PMC7525098; doi:10.1017/s0007114520001397), 2020-04-21
Supplement: S0007114520001397sup001.pdf [file S0007114520001397sup001.pdf]

**Supplemental Figure I. Participants' flow chart.**

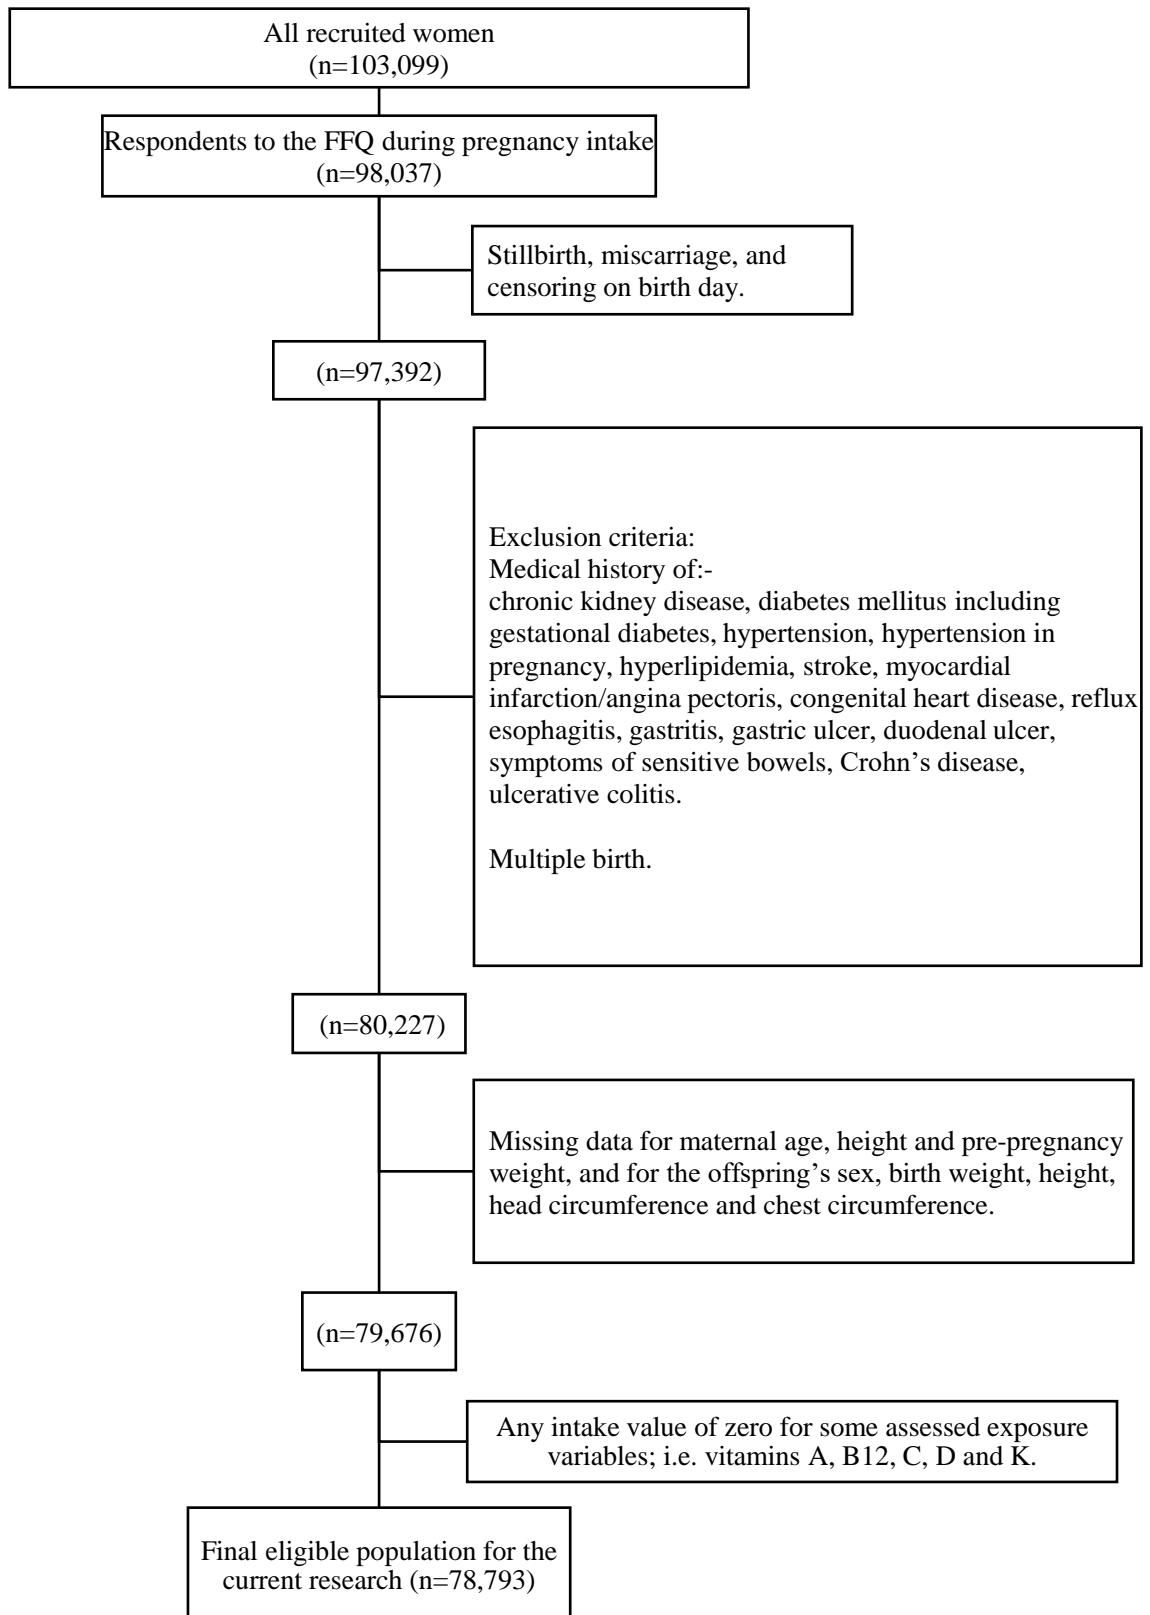

**Supplemental Table I. Univariate associations of maternal intakes of total energy and macronutrients during pregnancy with offspring birth size**

|                                                | Quartiles of energy and macronutrients intakes |              |              |              | P-value <sup>1</sup> |
|------------------------------------------------|------------------------------------------------|--------------|--------------|--------------|----------------------|
|                                                | Q1                                             | Q2           | Q3           | Q4           |                      |
| <b>Energy, median, kcal</b>                    | 1,119                                          | 1,468        | 1,792        | 2,389        |                      |
| Birth weight, mean (SE), g                     | 3,013 (3)                                      | 3,029 (3)    | 3,041 (3)    | 3,046 (3)    | <0.001               |
| Birth length, mean (SE), cm                    | 48.89 (0.02)                                   | 48.96 (0.02) | 49.00 (0.02) | 48.98 (0.02) | <0.001               |
| Head circumference, mean (SE), cm              | 33.13 (0.01)                                   | 33.19 (0.01) | 33.21 (0.01) | 33.24 (0.01) | <0.001               |
| Chest circumference, mean (SE), cm             | 31.72 (0.01)                                   | 31.77 (0.01) | 31.81 (0.01) | 31.85 (0.01) | <0.001               |
| Ponderal index, mean (SE), kg/m <sup>3</sup>   | 25.72 (0.02)                                   | 25.76 (0.02) | 25.80 (0.02) | 25.88 (0.02) | <0.001               |
| <b>Carbohydrate, median, E%</b>                | 46.4                                           | 52.9         | 57.6         | 63.8         |                      |
| Birth weight, mean (SE), g                     | 3,027 (3)                                      | 3,032 (3)    | 3,039 (3)    | 3,031 (3)    | <0.001               |
| Birth length, mean (SE), cm                    | 48.92 (0.02)                                   | 48.96 (0.02) | 49.01 (0.02) | 48.95 (0.02) | <0.001               |
| Head circumference, mean (SE), cm              | 33.19 (0.01)                                   | 33.20 (0.01) | 33.20 (0.01) | 33.18 (0.01) | 0.61                 |
| Chest circumference, mean (SE), cm             | 31.78 (0.01)                                   | 31.79 (0.01) | 31.80 (0.01) | 31.78 (0.01) | 0.21                 |
| Ponderal index, mean (SE), kg/m <sup>3</sup>   | 25.83 (0.02)                                   | 25.78 (0.02) | 25.78 (0.02) | 25.77 (0.02) | 0.19                 |
| <b>Fat, median, E%</b>                         | 22.6                                           | 27.8         | 31.8         | 37.3         |                      |
| Birth weight, mean (SE), g                     | 3,032 (3)                                      | 3,035 (3)    | 3,034 (3)    | 3,028 (3)    | 0.10                 |
| Birth length, mean (SE), cm                    | 48.97 (0.02)                                   | 48.97 (0.02) | 48.96 (0.02) | 48.93 (0.02) | 0.02                 |
| Head circumference, mean (SE), cm              | 33.18 (0.01)                                   | 33.20 (0.01) | 33.20 (0.01) | 33.18 (0.01) | 0.55                 |
| Chest circumference, mean (SE), cm             | 31.78 (0.01)                                   | 31.80 (0.01) | 31.79 (0.01) | 31.79 (0.01) | 0.71                 |
| Ponderal index, mean (SE), kg/m <sup>3</sup>   | 25.76 (0.02)                                   | 25.79 (0.02) | 25.80 (0.02) | 25.81 (0.02) | 0.48                 |
| <b>Protein, median, E%</b>                     | 11.4                                           | 12.9         | 14.1         | 15.8         |                      |
| Birth weight, mean (SE), g                     | 3,029 (3)                                      | 3,036 (3)    | 3,037 (3)    | 3,027 (3)    | 0.004                |
| Birth length, mean (SE), cm                    | 48.94 (0.02)                                   | 48.98 (0.02) | 49.00 (0.02) | 48.92 (0.02) | <0.001               |
| Head circumference, mean (SE), cm              | 33.16 (0.01)                                   | 33.19 (0.01) | 33.22 (0.01) | 33.20 (0.01) | <0.001               |
| Chest circumference, mean (SE), cm             | 31.78 (0.01)                                   | 31.80 (0.01) | 31.79 (0.01) | 31.78 (0.01) | 0.21                 |
| Ponderal index, mean (SE), kg/m <sup>3</sup>   | 25.79 (0.02)                                   | 25.79 (0.02) | 25.76 (0.02) | 25.80 (0.02) | 0.56                 |
| <b>Total dietary fiber, median, g/1000kcal</b> | 4.1                                            | 5.4          | 6.4          | 8.2          |                      |
| Birth weight, mean (SE), g                     | 3,016 (3)                                      | 3,028 (3)    | 3,041 (3)    | 3,043 (3)    | 0.01                 |
| Birth length, mean (SE), cm                    | 48.87 (0.02)                                   | 48.96 (0.02) | 49.00 (0.02) | 49.01 (0.02) | <0.001               |
| Head circumference, mean (SE), cm              | 33.12 (0.01)                                   | 33.18 (0.01) | 33.23 (0.01) | 33.23 (0.01) | <0.001               |
| Chest circumference, mean (SE), cm             | 31.73 (0.01)                                   | 31.78 (0.01) | 31.82 (0.01) | 31.83 (0.01) | 0.07                 |
| Ponderal index, mean (SE), kg/m <sup>3</sup>   | 25.80 (0.02)                                   | 25.75 (0.02) | 25.79 (0.02) | 25.81 (0.02) | <0.001               |

SE: standard error.

<sup>1</sup> Kruskal-Wallis test was used assuming skewed nutritional data.

**Supplemental Table II. Univariate associations between maternal intakes of vitamins during pregnancy and offspring birth size**

|                                              | Quartiles of vitamins intakes |              |              |              | P-value <sup>1</sup> |
|----------------------------------------------|-------------------------------|--------------|--------------|--------------|----------------------|
|                                              | Q1                            | Q2           | Q3           | Q4           |                      |
| <b>Vitamin A, median, µg/1000kcal</b>        | 143                           | 212          | 286          | 462          |                      |
| Birth weight, mean (SE), g                   | 3,026 (3)                     | 3,032 (3)    | 3,037 (3)    | 3,034 (3)    | 0.06                 |
| Birth length, mean (SE), cm                  | 48.92 (0.02)                  | 48.95 (0.02) | 48.98 (0.02) | 48.98 (0.02) | 0.11                 |
| Head circumference, mean (SE), cm            | 33.15 (0.01)                  | 33.19 (0.01) | 33.23 (0.01) | 33.19 (0.01) | <0.001               |
| Chest circumference, mean (SE), cm           | 31.75 (0.01)                  | 31.79 (0.01) | 31.81 (0.01) | 31.79 (0.01) | 0.008                |
| Ponderal index, mean (SE), kg/m <sup>3</sup> | 25.79 (0.02)                  | 25.80 (0.02) | 25.79 (0.02) | 25.77 (0.02) | 0.81                 |
| <b>Vitamin K, median, µg/1000kcal</b>        | 51                            | 80           | 110          | 172          |                      |
| Birth weight, mean (SE), g                   | 3,026 (3)                     | 3,034 (3)    | 3,035 (3)    | 3,034 (3)    | 0.03                 |
| Birth length, mean (SE), cm                  | 48.87 (0.02)                  | 48.96 (0.02) | 49.00 (0.02) | 49.02 (0.02) | <0.001               |
| Head circumference, mean (SE), cm            | 33.16 (0.01)                  | 33.19 (0.01) | 33.20 (0.01) | 33.21 (0.01) | 0.003                |
| Chest circumference, mean (SE), cm           | 31.78 (0.01)                  | 31.79 (0.01) | 31.81 (0.01) | 31.78 (0.01) | 0.38                 |
| Ponderal index, mean (SE), kg/m <sup>3</sup> | 25.89 (0.02)                  | 25.80 (0.02) | 25.75 (0.02) | 25.71 (0.02) | <0.001               |
| <b>Vitamin E, median, mg/1000kcal</b>        | 2.5                           | 3.2          | 3.8          | 4.7          |                      |
| Birth weight, mean (SE), g                   | 3,028 (3)                     | 3,039 (3)    | 3,038 (3)    | 3,023 (3)    | <0.001               |
| Birth length, mean (SE), cm                  | 48.92 (0.02)                  | 48.98 (0.02) | 48.99 (0.02) | 48.94 (0.02) | 0.004                |
| Head circumference, mean (SE), cm            | 33.16 (0.01)                  | 33.20 (0.01) | 33.22 (0.01) | 33.18 (0.01) | <0.001               |
| Chest circumference, mean (SE), cm           | 31.77 (0.01)                  | 31.81 (0.01) | 31.81 (0.01) | 31.76 (0.01) | <0.001               |
| Ponderal index, mean (SE), kg/m <sup>3</sup> | 25.81 (0.02)                  | 25.82 (0.02) | 25.79 (0.02) | 25.73 (0.02) | 0.01                 |
| <b>Vitamin D, median, µg/1000kcal</b>        | 1.0                           | 2.0          | 2.9          | 4.4          |                      |
| Birth weight, mean (SE), g                   | 3,028 (3)                     | 3,035 (3)    | 3,039 (3)    | 3,027 (3)    | 0.01                 |
| Birth length, mean (SE), cm                  | 48.93 (0.02)                  | 48.98 (0.02) | 48.99 (0.02) | 48.94 (0.02) | 0.05                 |
| Head circumference, mean (SE), cm            | 33.15 (0.01)                  | 33.21 (0.01) | 33.20 (0.01) | 33.20 (0.01) | <0.001               |
| Chest circumference, mean (SE), cm           | 31.77 (0.01)                  | 31.79 (0.01) | 31.82 (0.01) | 31.77 (0.01) | 0.004                |
| Ponderal index, mean (SE), kg/m <sup>3</sup> | 25.80 (0.02)                  | 25.78 (0.02) | 25.80 (0.02) | 25.78 (0.02) | 0.63                 |
| <b>Vitamin C, median, mg/1000kcal</b>        | 24                            | 38           | 52           | 77           |                      |
| Birth weight, mean (SE), g                   | 3,019 (3)                     | 3,034 (3)    | 3,041 (3)    | 3,034 (3)    | <0.001               |
| Birth length, mean (SE), cm                  | 48.87 (0.02)                  | 48.98 (0.02) | 49.01 (0.02) | 48.98 (0.02) | <0.001               |
| Head circumference, mean (SE), cm            | 33.15 (0.01)                  | 33.20 (0.01) | 33.21 (0.01) | 33.20 (0.01) | <0.001               |
| Chest circumference, mean (SE), cm           | 31.74 (0.01)                  | 31.80 (0.01) | 31.83 (0.01) | 31.78 (0.01) | <0.001               |
| Ponderal index, mean (SE), kg/m <sup>3</sup> | 25.82 (0.02)                  | 25.77 (0.02) | 25.80 (0.02) | 25.76 (0.02) | 0.23                 |
| <b>Vitamin B6, median, mg/1000kcal</b>       | 0.4                           | 0.5          | 0.6          | 0.7          |                      |
| Birth weight, mean (SE), g                   | 3,027 (3)                     | 3,038 (3)    | 3,036 (3)    | 3,028 (3)    | 0.009                |
| Birth length, mean (SE), cm                  | 48.90 (0.02)                  | 49.00 (0.02) | 48.98 (0.02) | 48.95 (0.02) | <0.001               |
| Head circumference, mean (SE), cm            | 33.17 (0.01)                  | 33.20 (0.01) | 33.21 (0.01) | 33.19 (0.01) | 0.02                 |
| Chest circumference, mean (SE), cm           | 31.77 (0.01)                  | 31.81 (0.01) | 31.80 (0.01) | 31.76 (0.01) | 0.006                |
| Ponderal index, mean (SE), kg/m <sup>3</sup> | 25.83 (0.02)                  | 25.78 (0.02) | 25.79 (0.02) | 25.75 (0.02) | 0.03                 |
| <b>Vitamin B9, median, µg/1000kcal</b>       | 97                            | 126          | 154          | 202          |                      |
| Birth weight, mean (SE), g                   | 3,025 (3)                     | 3,036 (3)    | 3,037 (3)    | 3,030 (3)    | 0.003                |
| Birth length, mean (SE), cm                  | 48.89 (0.02)                  | 48.98 (0.02) | 49.00 (0.02) | 48.97 (0.02) | <0.001               |
| Head circumference, mean (SE), cm            | 33.16 (0.01)                  | 33.20 (0.01) | 33.21 (0.01) | 33.20 (0.01) | <0.001               |
| Chest circumference, mean (SE), cm           | 31.77 (0.01)                  | 31.80 (0.01) | 31.80 (0.01) | 31.79 (0.01) | 0.18                 |
| Ponderal index, mean (SE), kg/m <sup>3</sup> | 25.84 (0.02)                  | 25.79 (0.02) | 25.78 (0.02) | 25.74 (0.02) | 0.003                |
| <b>Vitamin B12, median, µg/1000kcal</b>      | 1.1                           | 1.8          | 2.5          | 3.7          |                      |
| Birth weight, mean (SE), g                   | 3,027 (3)                     | 3,033 (3)    | 3,037 (3)    | 3,031 (3)    | 0.13                 |
| Birth length, mean (SE), cm                  | 48.94 (0.02)                  | 48.97 (0.02) | 49.00 (0.02) | 48.93 (0.02) | 0.11                 |
| Head circumference, mean (SE), cm            | 33.15 (0.01)                  | 33.20 (0.01) | 33.21 (0.01) | 33.21 (0.01) | <0.001               |
| Chest circumference, mean (SE), cm           | 31.77 (0.01)                  | 31.79 (0.01) | 31.81 (0.01) | 31.79 (0.01) | 0.24                 |
| Ponderal index, mean (SE), kg/m <sup>3</sup> | 25.78 (0.02)                  | 25.78 (0.02) | 25.77 (0.02) | 25.83 (0.02) | 0.28                 |

SE: standard error.

<sup>1</sup> Kruskal-Wallis test was used assuming skewed nutritional data.
